# Supplementary material
Source: Springer Nature journal article supplement (https://www.springermedizin.de/resource/supplementary/13054_2009_7627_MOESM2_ESM.pdf/9730186)

### Global end-diastolic volume versus age

(a)

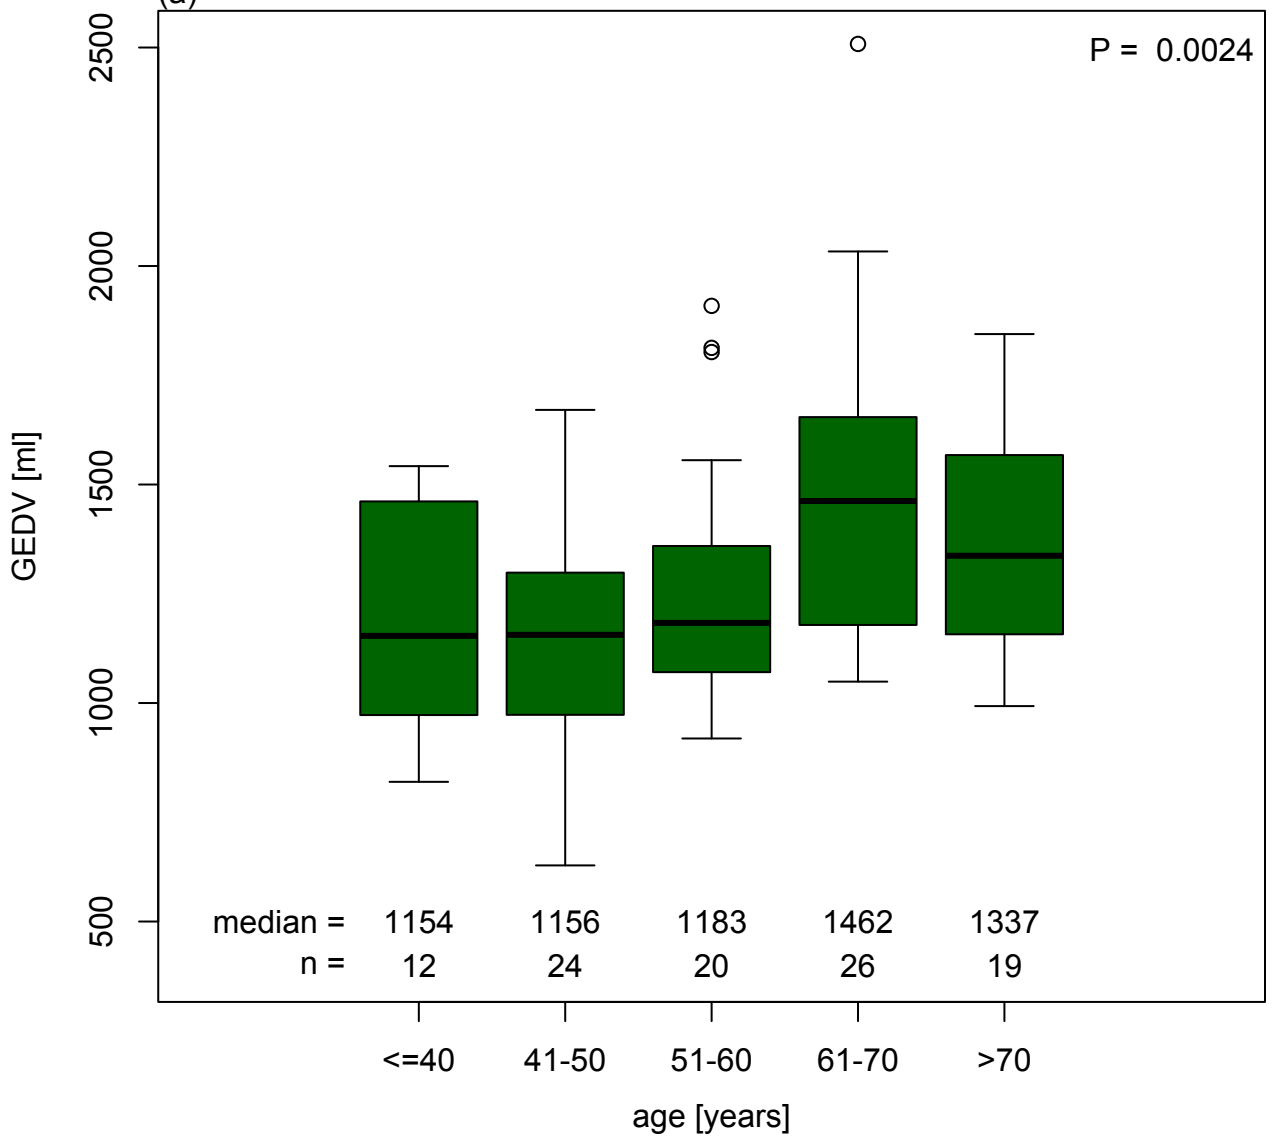

### Global end-diastolic volume index versus age

(b)

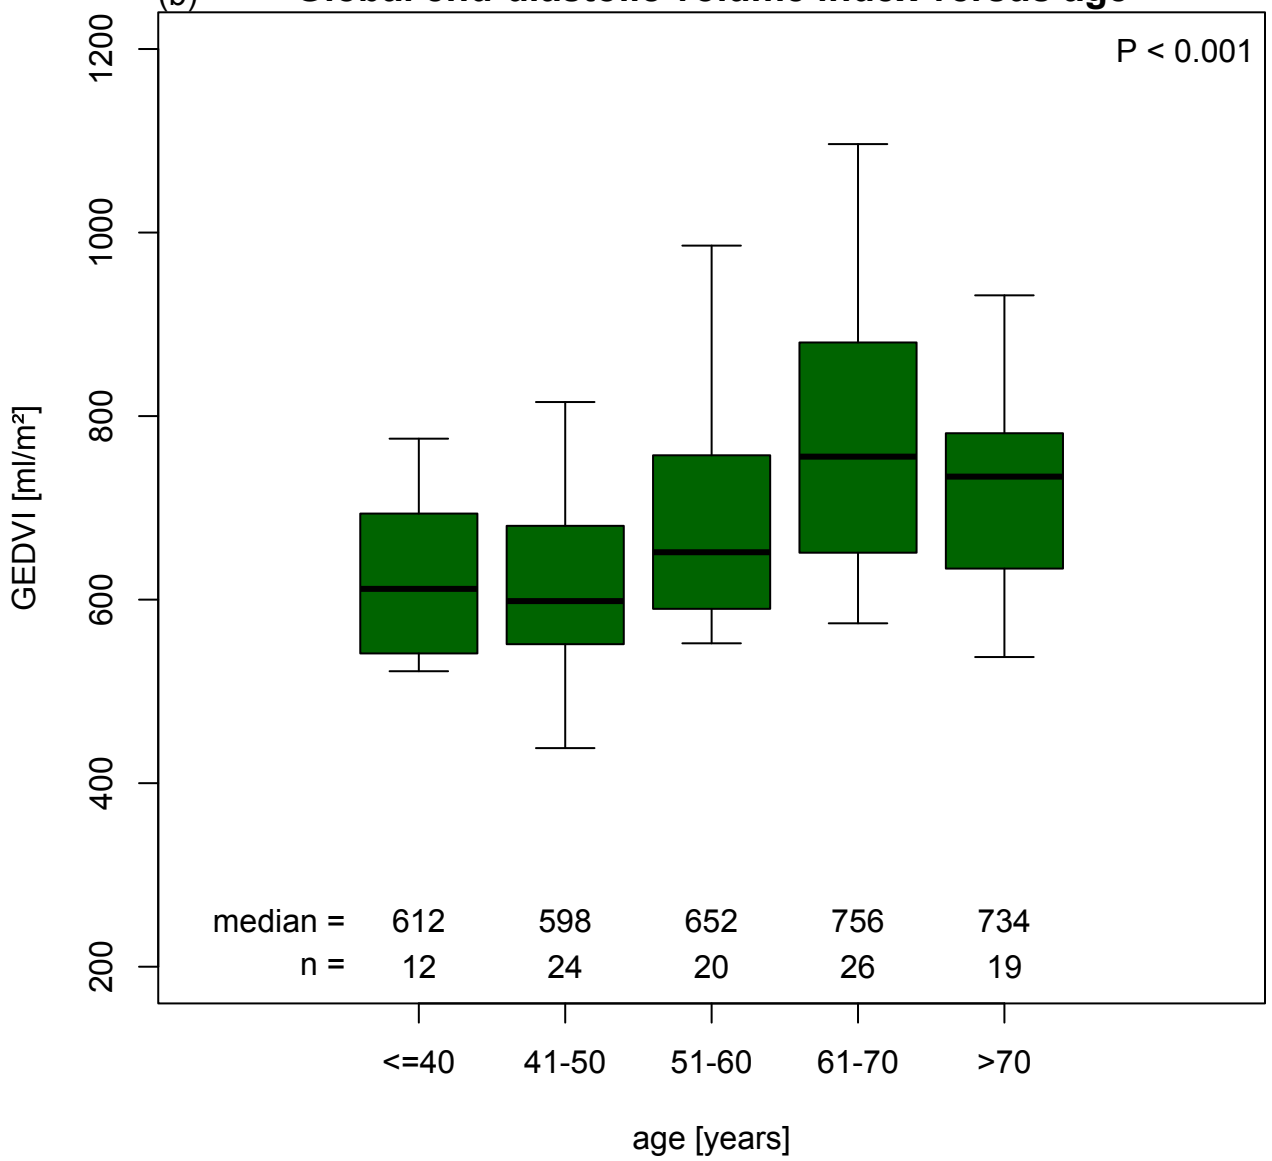

Supplement: MOESM2 [file 9730186]
